# Supplementary material for: One-year intensive lifestyle intervention and improvements in health-related quality of life and mental health in persons with type 2 diabetes: a secondary analysis of the U-TURN randomized controlled trial
Source: PubMed Central journal article supplement — BMJ Open Diabetes Res Care. 2021 Jan 13;9(1):e001840. doi: 10.1136/bmjdrc-2020-001840 (PMC7812095; doi:10.1136/bmjdrc-2020-001840), 2021-01-13
Supplement: bmjdrc-2020-001840supp002.pdf [file bmjdrc-2020-001840supp002.pdf]

## Supporting Material

### Stable 1 Sensitivity Analyses: Between-group comparisons of the changes in the primary, key secondary and exploratory outcomes from baseline to 12-month follow-up.

|                                          | n  | Intervention       | n  | StandardCare        | Difference               | P value |
|------------------------------------------|----|--------------------|----|---------------------|--------------------------|---------|
| <i>Primary outcomes:</i>                 |    |                    |    |                     |                          |         |
| SF36-PCS, points                         | 64 | 0.8 (-0.6 to 2.2)  | 34 | -1.9 (-3.8 to 0.1)  | 2.6 (0.3 to 5.0)         | 0.029   |
| <i>Key secondary outcomes</i>            |    |                    |    |                     |                          |         |
| SF36-PCS responders, no (%)**            | 64 | 19 (30)            | 34 | 6 (18)              | 4.04 (0.94 to 17.43)***  | 0.061   |
| SF36-MCS, points                         | 64 | -0.3 (-2.2 to 1.7) | 34 | 0.2 (-2.5 to 3.0)   | -0.5 (-3.9 to 2.9)       | 0.762   |
| SF36-MCS responders, no (%)**            | 64 | 16 (25)            | 34 | 9 (26)              | 2.43 (0.29 to 20.55)***  | (0.415) |
| <i>Other exploratory outcomes</i>        |    |                    |    |                     |                          |         |
| MHC-SF, points                           | 63 | -0.3 (-2.3 to 1.6) | 33 | 1.1 (-1.7 to 3.8)   | -1.4 (-4.8 to 2.0)       | (0.414) |
| Languishing, n (%)                       | 63 | 3 (5)              | 33 | 1 (3)               | NA*                      |         |
| Moderately mentally healthy, n (%)       |    | 10 (16)            |    | 9 (27)              | 0.19 (0.04 to 0.97)****  | (0.045) |
| Flourishing, n (%)                       |    | 50 (79)            |    | 23 (70)             | 2.93 (0.54 to 15.88)**** | (0.212) |
| WEMWBS, points                           | 58 | 2.0 (1.2 to 2.7)   | 25 | 2.6 (1.5 to 3.7)    | -0.6 (-2.0 to 0.7)       | (0.333) |
| SF-36 Physical functioning, points       | 64 | 1.2 (0.4 to 2.1)   | 34 | -0.9 (-2.0 to 0.3)  | 2.1 (0.6 to 3.5)         | (0.005) |
| SF-36 Bodily pain, points                | 64 | -1.4 (-3.3 to 0.6) | 34 | -3.2 (-5.9 to -0.5) | 1.8 (-1.5 to 5.2)        | (0.286) |
| SF-36 General health, points             | 64 | 3.5 (2.0 to 5.0)   | 34 | 0.2 (-1.9 to 2.3)   | 3.3 (0.7 to 5.9)         | (0.013) |
| SF-36 Physical role functioning, points  | 64 | -1.1 (-2.8 to 0.6) | 34 | -2.1 (-4.5 to 0.3)  | 1.0 (-1.9 to 3.9)        | (0.504) |
| SF-36 Vitality, points                   | 64 | 2.0 (0.1 to 4.0)   | 34 | -0.3 (-3.1 to 2.4)  | 2.4 (-1.0 to 5.7)        | (0.167) |
| SF-36 Mental health, points              | 64 | 0.7 (-1.4 to 2.8)  | 34 | -1.0 (-3.9 to 1.9)  | 1.7 (-1.9 to 5.3)        | (0.356) |
| SF-36 Emotional role functioning, points | 64 | -1.4 (-3.2 to 0.5) | 34 | -0.5 (-3.1 to 2.0)  | -0.8 (-4.0 to 2.4)       | (0.607) |
| SF-36 Social functioning, points         | 64 | -1.0 (-2.6 to 0.7) | 34 | -0.2 (-2.5 to 2.0)  | -0.7 (-3.6 to 2.1)       | (0.614) |
| GMS Positive affect, points              | 59 | 2.3 (0.9 to 3.8)   | 28 | 1.0 (-1.0 to 3.1)   | 1.3 (-1.2 to 3.8)        | (0.296) |
| GMS Negative affect, points              | 59 | -1.1 (-2.3 to 0.2) | 28 | -0.6 (-2.4 to 1.2)  | -0.5 (-2.7 to 1.7)       | (0.667) |

For continuous outcomes, estimates are adjusted Least-Squares Means (95% confidence intervals – CI) from linear mixed models. For dichotomous outcomes, estimates are adjusted odds ratios (95% CI) from logistic regression with repeated measures. Group-wise estimates for dichotomous outcomes are n (%) at 12 months follow-up. P-values in parentheses should be interpreted with caution, since they represent analyses performed after the gatekeeping procedure indicated discontinuation of analyses

\*The model failed to converge.

\*\*Responders defined as participants achieving a clinically significant improvement from baseline to 12-month follow-up: PCS improvement  $\geq 3.4$  points, MCS improvement  $\geq 4.6$  points

\*\*\*Numbers represent the adjusted odds ratio (95% CI).

\*\*\*\*Numbers represent the adjusted odds ratio (95% CI) comparing current category to the two other categories combined.
